# Supplementary material for: Identification of lipids and lipid-binding proteins in phloem exudates from Arabidopsis thaliana
Source: PubMed Central journal article supplement — J Exp Bot. 2012 Mar 21;63(10):3603–16. doi: 10.1093/jxb/ers028 (PMC3388829; doi:10.1093/jxb/ers028), 2012-03-21
Supplement: supp_ers028_00073106-file001.pdf [file supp_ers028_00073106-file001.pdf]

# Identification of lipids and lipid-binding proteins in phloem exudates from *Arabidopsis thaliana*

Brandon S Guelette, Urs F Benning, and Susanne Hoffmann-Benning

## Supplementary Figure legends

Supplementary Figure S1: Flow chart of phloem extraction and experimental setup. For preparation of phloem RNA, 100U/ml RNase inhibitor (Roche) was added to the deionized water into which the phloem exudate was collected.

Supplementary Figure S2: Time course of the appearance of proteins collected into water. Lane 1 contains the protein standard. Phloem exudate was collected for 1, 5, and 9 hours into deionized water (lanes 4, 3, and 2 respectively).

Supplementary Figure S3: GC-MS profile of total (non-phase-partitioned) phloem exudates after one hour of exudation into water (after EDTA treatment). Peaks marked with an asterisk are reagent peaks or column bleed; numbers indicate identified compounds and are cross-referenced in table 1.

Supplementary Table 1: Proteins identified in *Arabidopsis thaliana* phloem exudate; TF indicates the number of distinct tryptic fragments identified

**Collection and Extraction of Arabidopsis Phloem Sap**

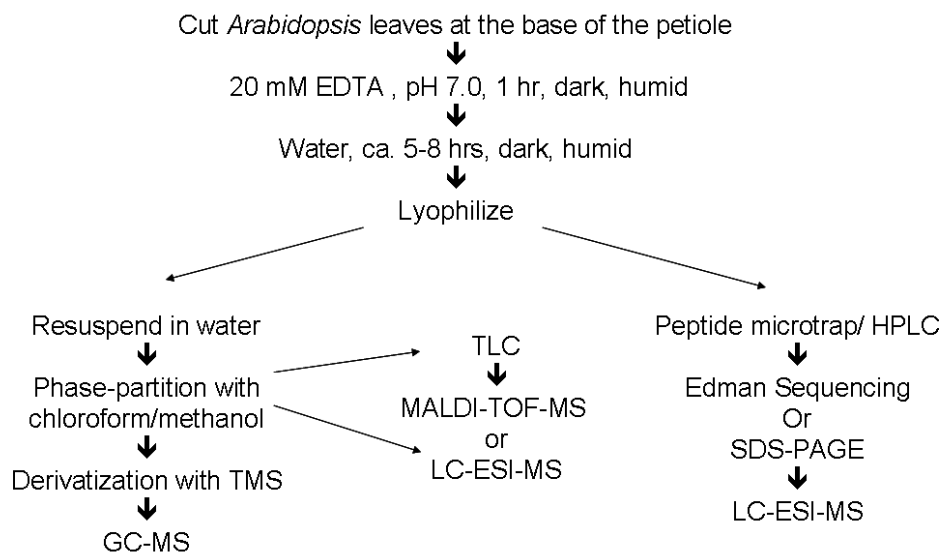

Guelette et al., Supplementary Figure 2

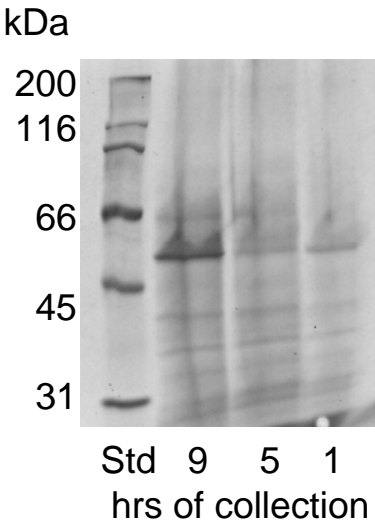

Guelette et al., Supplementary Figure S3

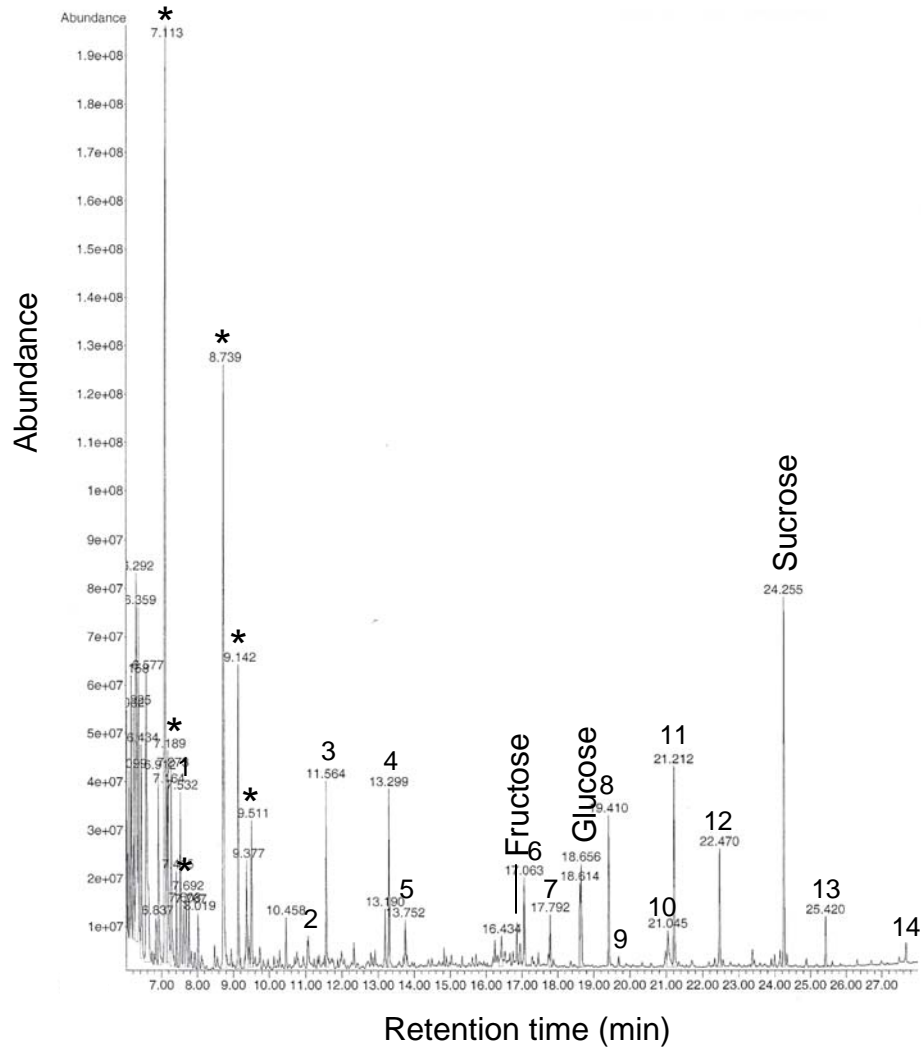

**Supplementary table 1:** Proteins identified in *Arabidopsis thaliana* phloem exudate; TF indicates the number of distinct tryptic fragments identified. UPP: unidentified phloem protein; \* homologous to proteins found in Brassica phloem exudates (Giavelisco et al., 2006)

| Identified Proteins                                        | # of TF | Accession Number       | MW (kDa) | Tryptic fragments                                                 | Additional Information                                |
|------------------------------------------------------------|---------|------------------------|----------|-------------------------------------------------------------------|-------------------------------------------------------|
| Fd-dependent glutamate synthase                            | 2       | At5g04140              | 180      | GNADIIQISGHDGGTGASPISSIK<br>LVAEAGIGTVASGVAK                      | Redox reactions                                       |
| Resistance protein homolog RPP1-WsB RPP8                   | 3       | At5g43470<br>AAC72978  | 141      | YITSLKELKIKEMK<br>KQTGEFGKAFTK<br>HQLLVGERDICEVLNDDTIDSR          | Nucleotide binding; pathogen response; LRR domain     |
| Ubiquitin-specific protease 26                             | 4       | At3g49600              | 120      | DCLMDGAR<br>AMLEASDSSFVDR<br>TIVQDLFSGSVSHVTTCSK<br>ASPEICEECIGER | Protein turnover                                      |
| Putative acid phosphatase/<br>Phosphoglycerate mutase-like | 3       | NP_186780<br>At3g01310 | 119      | VQLKPLK<br>VQLKPLKWVK<br>MCLDAKAPHLSSSTLPPTLPW                    | Phosphate homeostasis<br>Histidine phosphatase domain |
| Cysteine-rich receptor kinase                              | 2       | At4g38830              | 74       | LLGYSIEGTER<br>ILMTMSSYSSNMIK                                     | Protein phosphorylation                               |
| Putative Receptor Kinase (Rice)                            | 4       | Q9AUQ7<br>At3g17840    | 72       | ASAEVLGKGAFGTAY<br>VSQKADVYSFGVLI<br>LPGAALAGRVEGT                | Protein phosphorylation                               |
| HSA-like protein UPP1                                      | 2       | NP_001005208           | 69       | HLVDEPQNLIK<br>KVPQVSTPTLVEVSR                                    | Albumin domain; lipid-binding site                    |
| Tetratricopeptide repeat prot.                             | 1       | At5g58350              |          | RRLSSLSSSLPR                                                      | Protein phosphorylation                               |
| Hyp. Protein UPP2                                          | 2       | At5g48850              | 63       | ELVTGMRSAASK<br>SYMSFISSASISASK                                   |                                                       |
| Thioglucosidase/myrosinase*                                | 2       | At5g26000              | 61       | GYALGTDAPGR<br>LFNSGNFEK                                          | Defense; growth regulation                            |

|                                      |    |           |    |                                                                                                                                   |                                                                        |
|--------------------------------------|----|-----------|----|-----------------------------------------------------------------------------------------------------------------------------------|------------------------------------------------------------------------|
| Hypothetical protein UPP3            | 2  | At1g33020 | 61 | MKYNDR<br>TVELYMWVLEDVER                                                                                                          | F-box domain; receptor for ubiquitinated targets; prot.interaction     |
| Lipase class 3 family protein        | 2  | At4g16820 | 58 | VPGIFADNDK<br>VDMKMSPYLK                                                                                                          | triacylglycerol lipase activity                                        |
| RING zinc-finger protein             | 2  | At4g01270 | 56 | QKCSLK<br>DPCRLYFQSSGNQTDSIASDK                                                                                                   | Protein binding                                                        |
| Aspartic protease                    | 1  | At4g04460 | 56 | LN DENADMVPLK                                                                                                                     | Proteolysis, lipid metabolic processes, endomembrane system            |
| Glycine-rich protein (oleosin) GRP17 | 3  | At5g07530 | 53 | KKKCMSGGMSGSEEGMSGSEGGMS<br>SGGGSK<br>DNPPPAGLPPNSGAGAGGAQSLIKKS<br>K<br>KSMMSGMSGSEEGMSGSEGGMSSGG<br>GSK                         | Oleosin domain/lipid storage ATP/GTP-binding motif; lipid binding site |
| Ala-aminotransferase                 | 3  | At1g23310 | 53 | LLEATGISTVPGSGFGQK<br>LPTGALQAAK<br>DGYPSDPELIFLTDGASK                                                                            | Induced under anaerobic stress; gluconeogenesis                        |
| Putative kinase                      | 3  | At2g16750 | 53 | GFLEDGKGVAVK<br>TSISSDSPRGQESI<br>GVAVKTLKPSVK                                                                                    | Protein phosphorylation                                                |
| RubisCo LSU*                         | 11 | NP_051067 | 53 | DLAVEGNEIIR<br>LSGGDHXHAGTVVGK<br>VALEACVKAR<br>TFQGPPHGIQVER<br>LTYYTPEYETK<br>GGLDFTKDDENVNSQPFMR<br>YGRPLLGCTIKPK<br>DTDILAAFR | Photosynthesis                                                         |

|                                                 |    |           |    |                                                              |                                                                      |
|-------------------------------------------------|----|-----------|----|--------------------------------------------------------------|----------------------------------------------------------------------|
|                                                 |    |           |    | DDENVNSQPFMR<br>PLLGCTIKPK<br>DNGLLLHIHR                     |                                                                      |
| UDP-Glc-pyrophosphorylase*                      | 2  | At3g03250 | 52 | VLQLETAAGAAIR<br>IQTPTDEIVVPYEK                              | Glucose-metabolism;<br>phosphate homeostasis                         |
| MS5                                             | 2  | At4g20900 | 51 | CRLFEEETR<br>SGRIIEEA V LLEHK                                | Pollen development                                                   |
| SNM1                                            | 2  | At3g26680 | 50 | RLLLLHLHR<br>KRILLHIHR                                       | Sensitive to N <sub>2</sub> ; repair of<br>oxidative DNA damage      |
| Rubisco activase*                               | 2  | At2g39730 | 50 | GLAYDTSDDQQDITRGK<br>MEKFYWAPTR                              | Photosynthesis                                                       |
| Put. PIG-P                                      | Ed | At2g39435 | 50 | YDQQNFKSK                                                    | Phosphatidylinositol synthesis                                       |
| Myrosinase-binding Protein<br>like*             | 2  | At3g16470 | 48 | TSQPFGLTSGEEAELGGGK<br>VYVGQGSVVYVK                          | Defense; JA-inducible; lectin                                        |
| Enolase                                         | 2  | At2g36530 | 48 | VNQIGSVTESIEAVK<br>AGAVVSGIPLYK                              | Glycolysis; glucose<br>metabolism                                    |
| Monodehydroascorbate<br>reductase-like protein* | 2  | At3g52880 | 46 | EFANGQGVQPGELAVISK<br>TSVPDVYAVGDVATFPLK                     | Oxidative stress; redox<br>functions, salt tolerance                 |
| Sqd1                                            | 4  | At4g33030 | 44 | QASSFYHLSK<br>VEAEEHYNAK<br>VHDSHNIAFTCK<br>FCVQAAVGHPLTVYGK | Sulfolipid biosynthesis                                              |
| Put. Fructose biphosphate<br>aldolase *         | 3  | At4g38970 | 43 | GILAMDESNATCGK<br>MVDVLVEQNIVPGIK<br>LDSIGLENTEANR           | Some forms diurnal and<br>circadian regulated                        |
| Fructose-1,6-bisphosphatase                     | 3  | At3g55800 | 42 | GFPGTHEFLLLDEGK<br>GIFTNVTSPAK<br>YTGGNMVPDVMQIIVK           | Similar to FBpase;<br>gluconeogenesis; pentose-<br>phosphate pathway |
| Hydroxy methylbilane<br>synthase                | 2  | At5g08280 | 41 | GSPLALAQAYETR<br>YPALHVEENPR                                 | Protoporphyrin synthesis                                             |

|                                           |   |           |                      |                                                                                                                          |                                                      |
|-------------------------------------------|---|-----------|----------------------|--------------------------------------------------------------------------------------------------------------------------|------------------------------------------------------|
| Zn-bind. dehydrogenase/<br>oxidoreductase | 2 | At1g23740 | 41                   | VVAAALNPVDAK<br>VVALTGAVTPPGFR                                                                                           | IAA-induced                                          |
| GDSL motiv Lipase /hydrolase              | 1 | At1g29660 | 40                   | ITFSGQVENYK                                                                                                              | Pathogen-response; signaling                         |
| Glyceraldehyde-3-P-<br>dehydrogenase*     | 5 | At1g13440 | 37                   | TLLFGEKPVTVFGIR<br>VVDLIVEHMSK<br>SSIFDAK<br>AATYDEIKK<br>YDSVHGQWK                                                      | Gluconeogenesis; cytosol                             |
| GAPC-1*                                   | 6 | At3g04120 | 37<br><br><br><br>37 | YDSVHGQWK<br>FGIVEGLMTTVHSITATQK<br>DAPMFFVVGVEHEYK<br>VPTVDVSVVDLTVR<br>GILGYTEDDVVSTDFVGDNR<br>NPEDIPWAEAGADYVVESTGVFT | Gluconeogenesis; cytosol                             |
| Carbonic anhydrase                        | 1 | At3g01500 | 37                   | EKYETNPALYGELAK                                                                                                          | Stress response; zinc ion<br>binding; membrane bound |
| Annexin*                                  | 4 | At1g35720 | 36                   | TGTDEGALTR<br>YGDDHGEEILK<br>TLDKELSNDFER<br>TSTQLLHAR                                                                   | Phospholipid binding                                 |
| THI1                                      | 2 | At5g54770 | 36                   | ALDMNTAEDAIVR<br>LFNAVAAEDLIVK                                                                                           | Thiamine synthesis; DNA<br>repair                    |
| Cysteine synthase                         | 2 | At3g04940 | 35                   | EGLLVGISSGAAAR<br>VVLTMPSSMSLERK                                                                                         | Cysteine biosynthesis                                |
| Oxygen-evolving enhancer<br>protein       | 5 | At5g66570 | 35                   | GTGTANQCPTIDGGSETFSFKPGK<br>GGSTGYDNAVALPAGGR<br>SKPETGEVIGVFESLQPSDTDLGAK<br>RLTYDEIQSVK<br>GDEEELVKENVK                | Manganese-stabilizing protein<br>in PSII             |
| Putative 3-beta hydroxysteroid            | 2 | At2g37660 | 35                   | ELLVGKDDELLETETR                                                                                                         | Rossmann- fold NADP+                                 |



|                                            |        |                        |         |                                                                           |                                                                                                                                                       |
|--------------------------------------------|--------|------------------------|---------|---------------------------------------------------------------------------|-------------------------------------------------------------------------------------------------------------------------------------------------------|
| dehydrogenase/isomerase                    |        |                        |         | ALDLASKPEGTGTPTK                                                          | binding proteins; epimerase;                                                                                                                          |
| Putative protein UPP4                      | 2      | At5g02240              | 35      | ELLVGKDELLELQTDTK<br>ALFSQVTSRF                                           | Rossmann- fold NADP+<br>binding protein; ABA-ind.                                                                                                     |
| Inorganic phosphatase-like<br>protein      | 2      | At5g09650              | 33      | VQEEGPAESLDYR<br>AHLVNDVEDVEK                                             | PP cleavage; metabolism                                                                                                                               |
| Glyoxylase I-homologue                     | 5      | At1g11840              | 30      | GNAYAQIAIGTDDVYK<br>FLHVVYR<br>IVNQELGGK<br>DPDGYTFELIQR<br>TIEFYTEVFGMK  | Drought and salt tolerance                                                                                                                            |
| Ribonucleoprotein UPP5                     | 2      | At2g37220              | 29      | VNAGPPPPK<br>VSEAEARPPR                                                   | RNA-binding protein                                                                                                                                   |
| Isomerase ROC 4<br>(cyclophilin)-like      | 3      | At3g62030              | 29      | FEDENFTLK<br>IVMGLFGEVVPK<br>VYFDVEIGGEVAGR<br>HTGPGILSMANAGPNTNGSQFFICTV | Protein folding                                                                                                                                       |
| CYP2 (cyclophilin)*                        | 3      | At2g21130              | 18      | K<br>FEDENFER<br>IVMELYTDK<br>HVVFQVVEGLDVVK                              |                                                                                                                                                       |
| Ethylene-responsive RNA<br>helicase        | 2      | CAA09215<br>At5g63120  | 29      | LLTLLK<br>LLTLLKQLMDGSK                                                   | Nucleic-acid binding, ATP-<br>dependent helicase; DEAD-<br>box; nucleoplasmic transport;<br>transcription/translation<br>/splicing; ethylene response |
| 14-3-3-like protein GF14<br>epsilon<br>psi | 2<br>1 | At1g22300<br>At2g10450 | 28<br>9 | ILSSIEQK<br>DSTLIMQLLP<br>DSTLIMKILR                                      | Cis-acting regulatory element,<br>protein binding                                                                                                     |
| Chlorophyll a/b binding<br>protein         | 5      | At2g34420              | 28      | ELEVIHSR<br>FGAEVWFK                                                      |                                                                                                                                                       |

|                                     |   |           |    |                                                                                                                       |                                                                       |
|-------------------------------------|---|-----------|----|-----------------------------------------------------------------------------------------------------------------------|-----------------------------------------------------------------------|
|                                     |   |           |    | GPSGSPWYGSDR<br>WAMLGALGCVFPELLAR<br>LAMFSMFGFFVQAIVTGK                                                               |                                                                       |
| Cytosolic triosephosphate isomerase | 4 | At3g55440 | 27 | NVASDVAATTR<br>EAGSTMDVVAQTK<br>VTNWSNVVIAIYEPVWAIGTGK<br>ELGGQADVDGFLVGGASLKPEFIDIK                                  | Carbon metabolism                                                     |
| Glutathione S-transferase 8         | 3 | At1g78380 | 27 | FANFSIESEVPK<br>VTEFVSELR                                                                                             | Toxin catabolism; auxin regulated                                     |
| Thaumatococcus-like protein PR5     | 7 | At1g75040 | 26 | LGDGGFELTPGASR<br>YAGCVSDLNAACPDMLK<br>TGCNFDASGKGR<br>NNCPTTVWAGTLAGQGPK<br>QLTAPAGWSGR<br>CVTGDCGGLR<br>VMDQNNVVACK | Osmotin; pathogenesis related                                         |
| Protein with FHA domain UPP6        | 2 | At2g21530 | 26 | WLLKPVGDGDTR<br>ENEQISNISFLAK                                                                                         | Signal transduction; Forkhead associated domain; DNA/transcript. reg. |
| Cu/Zn Superoxide Dismutase CSD2     | 3 | At2g28190 | 22 | HAGDLGNINANADGVAETTIVDNQIP<br>LTGPNSVVGR<br>GTSDVEGVVTLTQDDSGPTTVNVR<br>GGHELSTTGNAGGR                                |                                                                       |
| Lipid-associated family protein     | 1 | At4g39730 | 20 | IYDKDGDYIGIK                                                                                                          | lipid/protein binding                                                 |
| Rubisco SSU*                        | 6 | At1g67090 | 20 | IIGFDNTR<br>LPLFGCTDSAQVLK<br>KKFETLSYLPDLTDSELAK<br>LPLFGCTDSAQVK<br>MQVWPPIGK<br>QVQCISFIAYKPPSFTG                  | Carbon fixation                                                       |

|                                 |   |           |    |                                                                      |                                                     |
|---------------------------------|---|-----------|----|----------------------------------------------------------------------|-----------------------------------------------------|
| L-PSP family protein            | 2 | At3g20390 | 20 | FVSESVEDQTEQVLK<br>ANNLVFLSGVLGLIPETGK                               | Endoribonuclease;                                   |
| Thioredoxin m                   | 2 | At1g03680 | 20 | LNTDESPATPGQYGVR<br>DTIIGAVSK                                        |                                                     |
| Major latex protein*            | 5 | At1g70890 | 18 | SFAFTLQVTPK<br>VLEGDLMNEYK<br>NKIEAVDPEK<br>IEAVDPEK<br>EIDEHLLAEE   | Pathogenesis related                                |
| Bet vI allergen-like protein    | 2 | At1g23130 | 18 | ERIEAVDQEK<br>VGSVIFWNYAIDGQPK                                       | Pathogenesis related                                |
| GRP7 (CCR2)*                    | 4 | At2g21660 | 17 | SITVNEAQRS<br>GFGFVTFKDMK<br>SGGGGGYSGGGGSYGGGGGR<br>ALETAFAYGDYIDSK | RNA-binding; circadian oscillations                 |
| Cu/Zn Superoxide dismutase CSD1 | 2 | At1g08830 | 15 | GGHELSTATGNAAGGR<br>AAVVVHADPDDLK                                    | Response to abiotic and biotic stress; cytosolic    |
| Thioredoxin h*                  | 2 | At5g42980 | 13 | VDVDELNTVAEEFK<br>EGEIKETVVGAAK                                      | Protection from oxidative damage                    |
| Putative CP12 protein           | 2 | At2g47400 | 13 | AGGSDPLEEYCNDNPETDECR<br>FGSMKRMVVVK                                 | Light regulation of calvin cycle; redox equivalents |
